# Supplementary material for: Tolerance to Ceftriaxone in Neisseria gonorrhoeae: Rapid Induction in WHO P Reference Strain and Detection in Clinical Isolates
Source: MDPI journal article supplement (doi:10.3390/antibiotics11111480), 2022-10-26
Supplement: s1 [file s1]

Supplementary materials “Tolerance to ceftriaxone in *Neisseria gonorrhoeae*: rapid induction in WHO P reference strain and detection in clinical isolates”.

**Table S1:** Tolerant colonies count of *N. gonorrhoeae* strains (n = 6) and two controls (A and B) cyclically exposed to ceftriaxone (CRO).

| Tolerant colonies count |   |    |    |    |    |    |    |
|-------------------------|---|----|----|----|----|----|----|
| Samples                 | 1 | 2  | 3  | 4  | 5  | 6  | 7  |
| A                       | / | /  | /  | /  | /  | /  | /  |
| B                       | / | /  | /  | /  | /  | /  | /  |
| 1                       | / | 83 | 67 | 8  | 6  | 7  | 9  |
| 2                       | / | 72 | 78 | 18 | 8  | /  | /  |
| 3                       | / | 18 | /  | 16 | 7  | 8  | 66 |
| 4                       | / | /  | 19 | 7  | 5  | 8  | 18 |
| 5                       | / | 15 | 18 | 16 | 7  | 6  | 20 |
| 6                       | / | 14 | 92 | 83 | 17 | 13 | 19 |

**Table S2:** No change in ceftriaxone minimum inhibitory concentration (MIC) of *N. gonorrhoeae* strains (n = 6) and two controls (A and B) cyclically exposed to ceftriaxone (CRO), determined through susceptibility testing via E-tests.

[illegible]

**Table S3:** The minimum inhibitory concentration (MIC) and susceptibility/resistance (S/R) of used WHO P reference and clinical *N. gonorrhoeae* strains for ceftriaxone (CRO), ciprofloxacin (CIP), and azithromycin (AZI) [46]. Plus, site of infection (anorectal – A, urogenital – U) and tolerance detection (yes – Y or no – N) of clinical isolates and gender of patients (male – M, female - F).

| Strain  | MIC (µg/mL) |           |           | Infection site | Tolerance | Gender |
|---------|-------------|-----------|-----------|----------------|-----------|--------|
|         | CRO         | CIP       | AZI       |                |           |        |
| WHO P   | 0.004 (S)   | 0.004 (S) | 4 (R)     | /              | /         |        |
| RA00002 | < 0.008 (S) | 0.5 (R)   | 0.094 (S) | A              | Y         | M      |
| RA00003 | < 0.008 (S) | 0.032 (S) | 2 (R)     | A              | Y         | M      |
| RA00007 | < 0.008 (S) | 0.023 (S) | 2 (R)     | A              | Y         | M      |
| RA00012 | < 0.008 (S) | 0.003 (S) | 0.094 (S) | U              | N         | M      |
| RA00015 | < 0.008 (S) | 1.5 (R)   | 0.19 (S)  | A              | Y         | M      |
| RA00018 | < 0.008 (S) | 3 (R)     | 0.094 (S) | U              | Y         | M      |
| RA00023 | < 0.008 (S) | 0.023 (S) | 2 (R)     | U              | Y         | M      |
| RA00024 | < 0.008 (S) | 1.5 (R)   | 0.19 (S)  | U              | N         | M      |
| RA00029 | < 0.008 (S) | 0.002 (S) | 0.19 (S)  | A              | Y         | M      |
| RA00032 | < 0.008 (S) | 0.023 (S) | 1.5 (R)   | A              | N         | M      |
| RA00035 | < 0.008 (S) | 0.006 (S) | 2 (R)     | A              | Y         | M      |
| RA00045 | < 0.008 (S) | 0.006 (S) | 1.5 (R)   | A              | Y         | M      |
| RA00069 | < 0.008 (S) | 0.75 (R)  | 0.19 (S)  | U              | N         | M      |
| RA00071 | < 0.008 (S) | 2 (R)     | 1 (S)     | A              | N         | M      |
| 22227   | < 0.008 (S) | 0.38 (S)  | 0.002 (S) | U              | N         | M      |
| 22235   | < 0.008 (S) | 0.094 (S) | 0.002 (S) | U              | N         | M      |
| 22249   | < 0.008 (S) | 0.125 (S) | 0.003 (S) | U              | N         | M      |
| 22253   | < 0.008 (S) | 0.125 (S) | 0.002 (S) | U              | Y         | F      |

**Table S4:** Tolerance not associated with accelerated induction of ceftriaxone resistance. Ceftriaxone minimum inhibitory concentration of *N. gonorrhoeae* tolerant colonies (n = 13) compared to controls (n = 4) under *in vitro* selective pressure via 7 consecutive crossover CRO E-test.

[illegible]
